# Supplementary material
Source: PubMed Central journal article supplement (PMC4772433)
Supplement: supp_kwv104_kwv104supp.pdf [file supp_kwv104_kwv104supp.pdf]

## **Web Tables**

### **Spousal influence on physical activity in middle-aged and older adults: The Atherosclerosis Risk in Communities Study**

Laura K Cobb\*, Job G Godino\*, Elizabeth Selvin, Anna Kucharska-Newton, Josef Coresh, Silvia Koton

\*Co-first authors

Web Table 1. Associations between individual physical activity, spousal physical activity, and baseline characteristics, the Atherosclerosis Risk in Communities (ARIC) Study. Complete results from fully adjusted models.

|                                   | Sport/Exercise Index, Men |        |       | Sport/Exercise Index, Women |        |       | Leisure Index, Men       |        |       | Leisure Index, Women     |        |       |
|-----------------------------------|---------------------------|--------|-------|-----------------------------|--------|-------|--------------------------|--------|-------|--------------------------|--------|-------|
|                                   | Physical activity change  | 95% CI |       | Physical activity change    | 95% CI |       | Physical activity change | 95% CI |       | Physical activity change | 95% CI |       |
| Spouse physical activity change   | 0.09                      | 0.05   | 0.12  | 0.08                        | 0.05   | 0.11  | 0.08                     | 0.05   | 0.11  | 0.09                     | 0.05   | 0.12  |
| <i>Individual characteristics</i> |                           |        |       |                             |        |       |                          |        |       |                          |        |       |
| Age                               | 0.01                      | 0.00   | 0.02  | 0.00                        | -0.02  | 0.01  | -0.01                    | -0.02  | 0.01  | 0.00                     | -0.02  | 0.01  |
| Minnesota whites                  | Ref                       |        |       | Ref                         |        |       | Ref                      |        |       | Ref                      |        |       |
| Mississippi blacks                | 0.20                      | 0.06   | 0.34  | 0.14                        | 0.00   | 0.27  | -0.02                    | -0.16  | 0.13  | 0.24                     | 0.09   | 0.39  |
| Maryland whites                   | -0.02                     | -0.11  | 0.07  | -0.05                       | -0.14  | 0.04  | 0.00                     | -0.09  | 0.10  | 0.09                     | 0.00   | 0.19  |
| North Carolina blacks             | -0.02                     | -0.33  | 0.29  | 0.21                        | -0.08  | 0.51  | 0.59                     | 0.27   | 0.92  | 0.39                     | 0.06   | 0.73  |
| North Carolina blacks             | -0.04                     | -0.13  | 0.05  | 0.01                        | -0.08  | 0.10  | 0.12                     | 0.02   | 0.22  | 0.24                     | 0.14   | 0.34  |
| < High school education           | Ref                       |        |       | Ref                         |        |       | Ref                      |        |       | Ref                      |        |       |
| High school or college            | 0.00                      | -0.11  | 0.10  | -0.01                       | -0.13  | 0.10  | -0.06                    | -0.17  | 0.05  | 0.13                     | 0.01   | 0.26  |
| Graduate school                   | 0.07                      | -0.05  | 0.18  | -0.04                       | -0.17  | 0.08  | -0.06                    | -0.18  | 0.06  | 0.10                     | -0.04  | 0.24  |
| Employed                          | Ref                       |        |       | Ref                         |        |       | Ref                      |        |       | Ref                      |        |       |
| Retired                           | -0.29                     | -0.40  | -0.18 | -0.10                       | -0.25  | 0.05  | -0.15                    | -0.27  | -0.04 | -0.19                    | -0.36  | -0.02 |
| Homemaker                         | 1.22                      | 0.10   | 2.34  | -0.16                       | -0.24  | -0.08 | 0.18                     | -1.00  | 1.36  | -0.15                    | -0.24  | -0.06 |
| Unemployed                        | -0.15                     | -0.44  | 0.13  | -0.22                       | -0.47  | 0.03  | -0.01                    | -0.31  | 0.28  | -0.36                    | -0.65  | -0.08 |
| Current smoker                    | Ref                       |        |       | Ref                         |        |       | Ref                      |        |       | Ref                      |        |       |
| Former smoker                     | 0.06                      | -0.03  | 0.16  | 0.10                        | 0.00   | 0.21  | -0.05                    | -0.15  | 0.05  | 0.00                     | -0.12  | 0.12  |
| Never smoker                      | 0.03                      | -0.07  | 0.13  | 0.11                        | 0.02   | 0.21  | -0.05                    | -0.15  | 0.06  | 0.09                     | -0.02  | 0.19  |
| Excellent health                  | Ref                       |        |       | Ref                         |        |       | Ref                      |        |       | Ref                      |        |       |
| Good health                       | 0.04                      | -0.04  | 0.12  | 0.00                        | -0.08  | 0.07  | 0.00                     | -0.08  | 0.08  | -0.05                    | -0.14  | 0.03  |
| Fair health                       | 0.05                      | -0.08  | 0.18  | -0.03                       | -0.16  | 0.10  | -0.14                    | -0.28  | -0.01 | -0.11                    | -0.26  | 0.04  |
| Poor health                       | -0.09                     | -0.41  | 0.24  | -0.07                       | -0.41  | 0.27  | 0.06                     | -0.28  | 0.40  | 0.25                     | -0.13  | 0.63  |
| BMI                               | 0.00                      | -0.01  | 0.00  | 0.00                        | -0.01  | 0.00  | 0.01                     | 0.00   | 0.02  | -0.01                    | -0.02  | 0.00  |
| Diabetes                          | 0.05                      | -0.07  | 0.16  | 0.04                        | -0.09  | 0.17  | -0.08                    | -0.21  | 0.04  | 0.19                     | 0.04   | 0.34  |
| Hypertension                      | 0.01                      | -0.07  | 0.09  | 0.05                        | -0.03  | 0.13  | 0.00                     | -0.08  | 0.09  | -0.01                    | -0.11  | 0.08  |
| No baseline CVD                   | Ref                       |        |       | Ref                         |        |       | Ref                      |        |       | Ref                      |        |       |
| Baseline CVD                      | -0.13                     | -0.26  | 0.00  | -0.28                       | -0.51  | -0.05 | -0.05                    | -0.19  | 0.09  | 0.06                     | -0.20  | 0.32  |
| CVD status missing                | 0.04                      | -0.22  | 0.30  | 0.04                        | -0.19  | 0.26  | -0.25                    | -0.53  | 0.02  | -0.02                    | -0.28  | 0.23  |
| Cancer                            | 0.01                      | -0.16  | 0.19  | 0.00                        | -0.14  | 0.14  | 0.13                     | -0.05  | 0.31  | 0.01                     | -0.15  | 0.16  |
| Lung disease                      | 0.04                      | -0.13  | 0.22  | -0.08                       | -0.25  | 0.09  | -0.18                    | -0.37  | 0.00  | -0.04                    | -0.24  | 0.15  |
|                                   | Sport/Exercise            |        |       | Sport/Exercise              |        |       | Leisure                  |        |       | Leisure                  |        |       |

|                                | Index, Men               |        |       | Index, Women             |        |      | Index, Men               |        |       | Index, Women             |        |      |
|--------------------------------|--------------------------|--------|-------|--------------------------|--------|------|--------------------------|--------|-------|--------------------------|--------|------|
|                                | Physical activity change | 95% CI |       | Physical activity change | 95% CI |      | Physical activity change | 95% CI |       | Physical activity change | 95% CI |      |
| <i>Spousal characteristics</i> |                          |        |       | Ref                      |        |      | Ref                      |        |       | Ref                      |        |      |
| Age                            | 0.01                     | 0.00   | 0.02  | 0.00                     | -0.01  | 0.01 | 0.01                     | -0.01  | 0.02  | 0.00                     | -0.02  | 0.01 |
| < High school education        | Ref                      |        |       |                          |        |      |                          |        |       |                          |        |      |
| High school or college         | 0.06                     | -0.06  | 0.17  | 0.02                     | -0.08  | 0.12 | -0.02                    | -0.14  | 0.10  | 0.02                     | -0.10  | 0.13 |
| Graduate school                | 0.06                     | -0.07  | 0.19  | 0.08                     | -0.03  | 0.19 | -0.03                    | -0.16  | 0.11  | 0.11                     | -0.02  | 0.23 |
| Employed                       | Ref                      |        |       | Ref                      |        |      | Ref                      |        |       | Ref                      |        |      |
| Retired                        | 0.04                     | -0.12  | 0.19  | 0.08                     | -0.02  | 0.19 | 0.04                     | -0.12  | 0.20  | 0.06                     | -0.06  | 0.18 |
| Homemaker                      | 0.03                     | -0.05  | 0.11  | 0.71                     | -0.38  | 1.79 | 0.01                     | -0.08  | 0.10  | 1.92                     | 0.69   | 3.14 |
| Unemployed                     | 0.25                     | -0.01  | 0.51  | 0.07                     | -0.20  | 0.34 | -0.03                    | -0.30  | 0.24  | -0.12                    | -0.42  | 0.19 |
| Current smoker                 | Ref                      |        |       | Ref                      |        |      | Ref                      |        |       | Ref                      |        |      |
| Former smoker                  | -0.05                    | -0.16  | 0.06  | 0.01                     | -0.08  | 0.10 | 0.05                     | -0.07  | 0.16  | -0.07                    | -0.17  | 0.03 |
| Never smoker                   | -0.02                    | -0.12  | 0.07  | -0.01                    | -0.11  | 0.09 | 0.00                     | -0.10  | 0.10  | -0.12                    | -0.23  | 0.00 |
| Excellent health               | Ref                      |        |       | Ref                      |        |      | Ref                      |        |       | Ref                      |        |      |
| Good health                    | -0.05                    | -0.13  | 0.02  | -0.03                    | -0.10  | 0.05 | 0.04                     | -0.04  | 0.13  | -0.04                    | -0.13  | 0.04 |
| Fair health                    | 0.01                     | -0.13  | 0.14  | -0.02                    | -0.14  | 0.11 | 0.08                     | -0.06  | 0.23  | 0.01                     | -0.14  | 0.15 |
| Poor health                    | -0.14                    | -0.49  | 0.21  | -0.26                    | -0.58  | 0.05 | 0.41                     | 0.04   | 0.77  | 0.02                     | -0.33  | 0.37 |
| BMI                            | 0.00                     | -0.01  | 0.00  | 0.00                     | -0.01  | 0.01 | 0.00                     | -0.01  | 0.01  | 0.00                     | -0.01  | 0.01 |
| Diabetes                       | 0.10                     | -0.04  | 0.23  | -0.05                    | -0.16  | 0.06 | -0.17                    | -0.32  | -0.03 | 0.02                     | -0.11  | 0.15 |
| Hypertension                   | -0.02                    | -0.10  | 0.07  | 0.06                     | -0.02  | 0.13 | 0.06                     | -0.03  | 0.15  | 0.01                     | -0.07  | 0.10 |
| Baseline CVD                   | Ref                      |        |       | Ref                      |        |      | Ref                      |        |       | Ref                      |        |      |
| No CVD                         | 0.12                     | -0.12  | 0.36  | 0.01                     | -0.12  | 0.14 | -0.04                    | -0.29  | 0.21  | 0.02                     | -0.12  | 0.17 |
| CVD status missing             | -0.04                    | -0.27  | 0.19  | -0.01                    | -0.26  | 0.24 | -0.16                    | -0.40  | 0.08  | 0.27                     | -0.01  | 0.55 |
| Cancer                         | -0.17                    | -0.31  | -0.02 | 0.12                     | -0.04  | 0.29 | -0.02                    | -0.17  | 0.13  | -0.07                    | -0.26  | 0.12 |
| Lung disease                   | 0.04                     | -0.14  | 0.21  | 0.09                     | -0.08  | 0.26 | -0.01                    | -0.19  | 0.17  | 0.01                     | -0.18  | 0.20 |

Abbreviations: BMI, body mass index presented as kg/m<sup>2</sup>; CI, confidence interval; CVD, cardiovascular disease.

Web Table 2. Cross-sectional and longitudinal associations of meeting physical activity recommendations across spousal pairs<sup>a</sup>, the Atherosclerosis Risk in Communities (ARIC) Study

| Physical Activity Recommendations                                         | Men  |            |                | Women |            |                |
|---------------------------------------------------------------------------|------|------------|----------------|-------|------------|----------------|
|                                                                           | OR   | 95% CI     | <i>P</i> Value | OR    | 95% CI     | <i>P</i> Value |
| Cross sectional                                                           |      |            |                |       |            |                |
| Meets physical activity recommendations at visit 1                        | 1.56 | 1.34, 1.83 | <0.001         | 1.56  | 1.33, 1.82 | <0.001         |
| Participant begins to meet physical activity recommendations <sup>b</sup> |      |            |                |       |            |                |
| Spouse never meets recommendations (no change)                            | Ref  |            |                | Ref   |            |                |
| Spouse begins to meet recommendations                                     | 1.42 | 1.05, 1.92 | 0.024          | 1.44  | 1.07, 1.96 | 0.018          |
| Spouse continues to meet recommendations (no change)                      | 1.70 | 1.23, 2.36 | 0.001          | 1.43  | 1.09, 1.88 | 0.011          |
| Spouse no longer meets recommendations                                    | 0.87 | 0.63, 1.21 | 0.421          | 0.71  | 0.51, 0.99 | 0.043          |

Abbreviations: CI, confidence interval; OR, odds ratio.

<sup>a</sup> All models controlled for individual and spousal characteristics (age, race and study center, education, employment status, smoking status, health status, body mass index, diabetes, hypertension, coronary heart disease, and cancer). Adjustment attenuates the association slightly, but only changes the interpretation in the case of women whose husbands no longer meet physical activity recommendations. This association is not significant in unadjusted models.

<sup>b</sup> Limited to those not meeting recommendations at visit 1: 1783 men and 2171 women; 450 men and 475 women who did not meet recommendations at visit 1 met recommendations at visit 3.
